# Supplementary material for: Pure CO2 electrolysis over an Ni/YSZ cathode in a solid oxide electrolysis cell
Source: Royal Society of Chemistry journal article supplement (doi:10.1039/c8ta02858c), 2018-01-01
Supplement: c8ta02858c1.pdf [file c8ta02858c1.pdf]

## Supplementary Information

### Pure CO<sub>2</sub> electrolysis over an Ni/YSZ cathode in a solid oxide electrolysis cell

Yuefeng Song,<sup>a, b, c, ‡</sup> Zhiwen Zhou,<sup>a, b, c, ‡</sup> Xiaomin Zhang,<sup>a, c</sup> Yingjie Zhou,<sup>a, c</sup> Huimin Gong,<sup>c</sup> Houfu Lv,<sup>a, b, c</sup> Qingxue Liu,<sup>a, b, c</sup> Guoxiong Wang<sup>a, c\*</sup> and Xinhe Bao<sup>a, c\*</sup>

<sup>a</sup> State Key Laboratory of Catalysis, CAS Center for Excellence in Nanoscience, Dalian Institute of Chemical Physics, Chinese Academy of Sciences, Dalian, 116023, China.

<sup>b</sup> University of Chinese Academy of Sciences, Beijing, 100039, China.

<sup>c</sup> Dalian National Laboratory for Clean Energy, Dalian Institute of Chemical Physics, Chinese Academy of Sciences, Dalian, 116023, China.

<sup>‡</sup> These authors have contributed equally to this work.

\*Email: wanggx@dicp.ac.cn, xhbao@dicp.ac.cn.

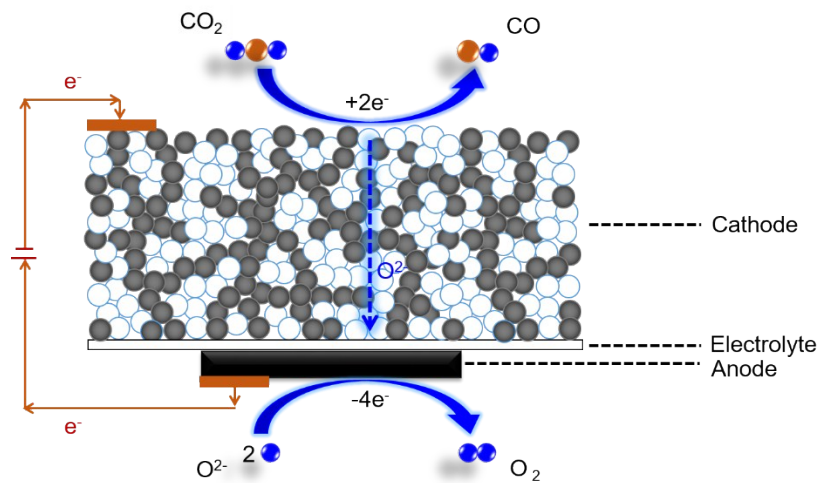

Figure S1. Schematic diagram of the SOEC for CO<sub>2</sub> electrolysis.

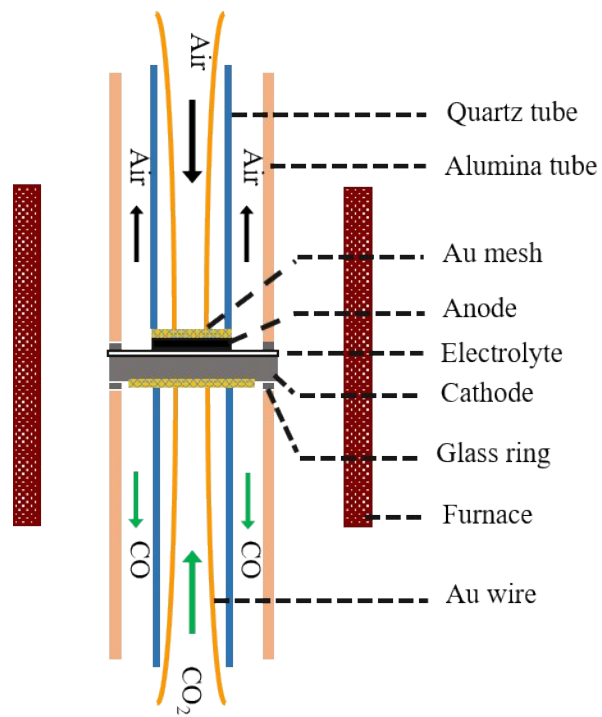

Figure S2. Schematic diagram of the SOEC test station.

Table S1. High-temperature CO<sub>2</sub> electrolysis over Ni/YSZ cathode.

| The structure of SOEC                                            | Reactant gas to cathode                                  | Temperature             | Ref. |
|------------------------------------------------------------------|----------------------------------------------------------|-------------------------|------|
| Ni-YSZ YSZ YSZ-LSM LSM                                           | CO <sub>2</sub> + CO                                     | 700°C - 800°C           | 1    |
| Ni-YSZ YSZ YSZ-LSM                                               | CO <sub>2</sub> + CO                                     | 800°C                   | 2    |
| Ni-GDC YSZ GDC LSM-YSZ                                           | CO <sub>2</sub> + CO                                     | 800°C                   | 3    |
| Ni-YSZ YSZ LSM-YSZ                                               | CO <sub>2</sub> + CO<br>CO <sub>2</sub> + H <sub>2</sub> | 700°C - 1000°C          | 4    |
| Ni-YSZ YSZ YDC LSFC                                              | CO <sub>2</sub> + H <sub>2</sub>                         | 700°C                   | 5    |
| Ni-YSZ YSZ GDC PBC-GDC                                           | CO <sub>2</sub> + CO                                     | 700°C                   | 6    |
| Ni-YSZ YSZ LSM-YSZ                                               | CO <sub>2</sub> + H <sub>2</sub> O + H <sub>2</sub>      | 850°C                   | 7    |
| Ni-YSZ YSZ LSM-YSZ                                               | CO <sub>2</sub> + CO                                     | 850°C                   | 8    |
| Ni-YSZ YSZ LSM-YSZ                                               | CO <sub>2</sub> + H <sub>2</sub> O + H <sub>2</sub>      | 800°C<br>850°C          | 9    |
| Ni-YSZ YSZ LSM-YSZ                                               | CO <sub>2</sub> + H <sub>2</sub> O + H <sub>2</sub>      | ~875°C                  | 10   |
| Ni-YSZ YSZ LSM-YSZ                                               | CO <sub>2</sub> + CO                                     | 850°C                   | 11   |
| Ni-YSZ YSZ LSM-YSZ                                               | CO <sub>2</sub> + H <sub>2</sub> O + H <sub>2</sub>      | 800°C                   | 12   |
| Ni-YSZ YSZ LSM-YSZ                                               | CO <sub>2</sub> + CO                                     | 850°C                   | 13   |
| Ni-YSZ YSZ LSCF-GDC<br>Ni-YSZ YSZ LSM-YSZ                        | CO <sub>2</sub> + H <sub>2</sub> O + H <sub>2</sub>      | 800°C                   | 14   |
| Ni-YSZ YSZ LSCF-GDC                                              | CO <sub>2</sub> + H <sub>2</sub>                         | 800°C                   | 15   |
| Ni-YSZ YSZ LSM-ESB                                               | CO <sub>2</sub> + H <sub>2</sub>                         | 800°C                   | 16   |
| Ni-YSZ YSZ GDC LSCF<br>Ni-GDC YSZ GDC LSCF<br>Ni-YSZ YSZ LSM-YSZ | CO <sub>2</sub> + H <sub>2</sub> + N <sub>2</sub>        | 1000°C                  | 17   |
| Ni-YSZ YSZ GDC LSCF LSM                                          | CO <sub>2</sub> + CO                                     | 650°C<br>700°C<br>750°C | 18   |
| Ni-YSZ YSZ LSM-YSZ                                               | CO <sub>2</sub> + CO<br>CO <sub>2</sub> + H <sub>2</sub> | 1000°C                  | 19   |
| Ni-YSZ YSZ LSM-YSZ<br>Ni-SDC YSZ LSM-YSZ                         | CO <sub>2</sub> + H <sub>2</sub> + N <sub>2</sub>        | 1000°C                  | 20   |

Table S2. Theoretical OCV of Ni/YSZ-supported SOEC with 95% CO<sub>2</sub> + 5% N<sub>2</sub> at cathode and air at anode.

|                            | 700 °C                   | 750 °C                   | 800 °C                   |
|----------------------------|--------------------------|--------------------------|--------------------------|
| K <sub>1</sub>             | 3.001×10 <sup>-3</sup>   | 3.987×10 <sup>-3</sup>   | 5.160×10 <sup>-3</sup>   |
| K <sub>2</sub>             | 2.380×10 <sup>-11</sup>  | 1.312×10 <sup>-10</sup>  | 6.163×10 <sup>-10</sup>  |
| [O <sub>2</sub> ]          | 0.6290×10 <sup>-16</sup> | 0.1083×10 <sup>-14</sup> | 0.1427×10 <sup>-13</sup> |
| OCV <sub>theoretical</sub> | 0.749 V                  | 0.725 V                  | 0.701 V                  |

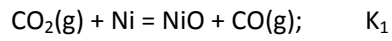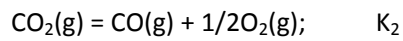

$$K_1 = \frac{[\text{CO}]}{[\text{CO}_2]}$$
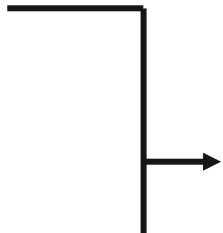

$$[\text{O}_2]_{\text{Cathode}} = \left(\frac{K_2}{K_1}\right)^2$$

$$K_2 = \frac{[\text{CO}][\text{O}_2]^{1/2}}{[\text{CO}_2]}$$

$$E_{\text{Nernst}} = \frac{RT}{4F} \ln \left( \frac{[\text{O}_2]_{\text{Anode}}}{[\text{O}_2]_{\text{Cathode}}} \right) \quad R = 8.314 \text{ J mol}^{-1} \text{ K}^{-1}, F = 96485 \text{ C mol}^{-1}, [\text{O}_2]_{\text{Anode}} = 0.21$$

Table S3. Theoretical OCV of SOEC with 95% CO<sub>2</sub> + 5% N<sub>2</sub> at cathode and air at anode.

|                            | 700 °C                  | 750 °C                  | 800 °C                  |
|----------------------------|-------------------------|-------------------------|-------------------------|
| K <sub>2</sub>             | 2.380×10 <sup>-11</sup> | 1.312×10 <sup>-10</sup> | 6.163×10 <sup>-10</sup> |
| [O <sub>2</sub> ]          | 0.521×10 <sup>-8</sup>  | 0.163×10 <sup>-7</sup>  | 0.456×10 <sup>-7</sup>  |
| OCV <sub>theoretical</sub> | 0.320 V                 | 0.311 V                 | 0.302 V                 |

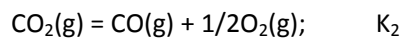

$$K_2 = \frac{[\text{CO}][\text{O}_2]^{1/2}}{[\text{CO}_2]} = \frac{2[\text{O}_2]^{3/2}}{[\text{CO}_2]} \longrightarrow [\text{O}_2]_{\text{Cathode}} = \left( \frac{K_2[\text{CO}_2]}{2} \right)^{2/3}$$

$$E_{\text{Nernst}} = \frac{RT}{4F} \ln \left( \frac{[\text{O}_2]_{\text{Anode}}}{[\text{O}_2]_{\text{Cathode}}} \right) \quad R = 8.314 \text{ J mol}^{-1} \text{ K}^{-1}, F = 96485 \text{ C mol}^{-1}, [\text{O}_2]_{\text{Anode}} = 0.21$$

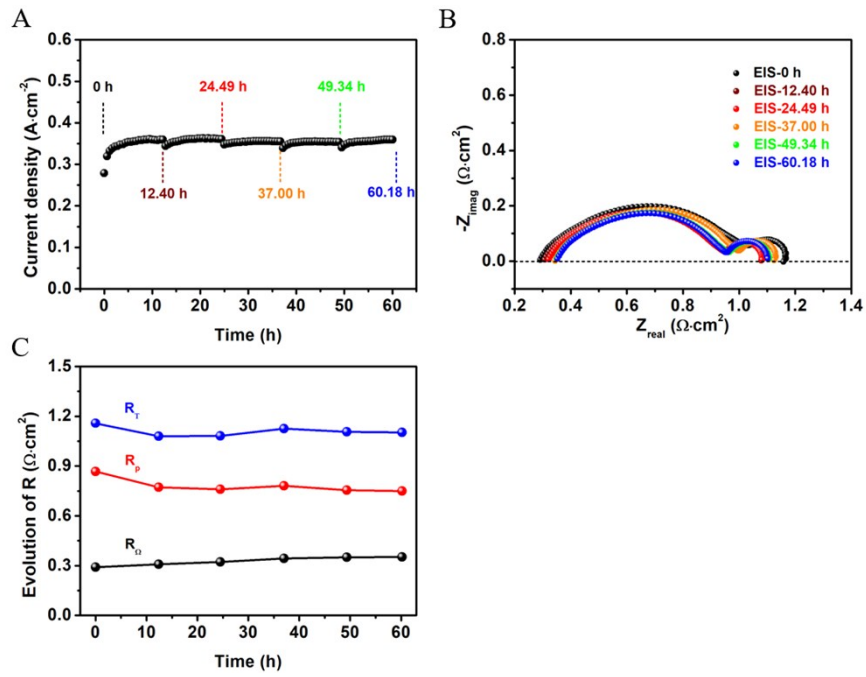

Figure S3. (A) Stability test of pure CO<sub>2</sub> electrolysis at the voltage of 1.5 V at 700 °C, (B) EIS of the cell at 1.5 V and 700 °C with pure CO<sub>2</sub> to the cathode and air to the anode and (C) The evolution of resistance.

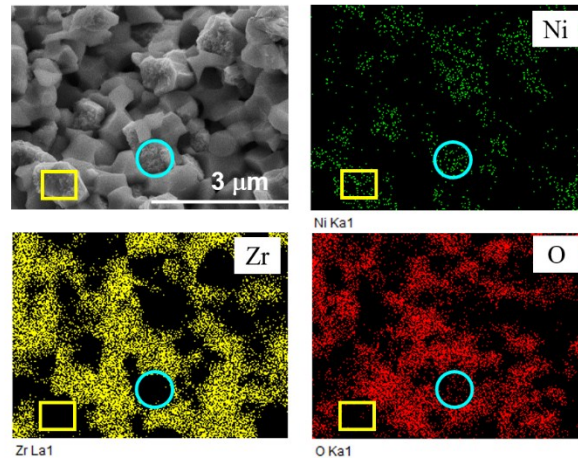

Figure S4. EDS mappings of the Ni/YSZ cathode after the stability test.



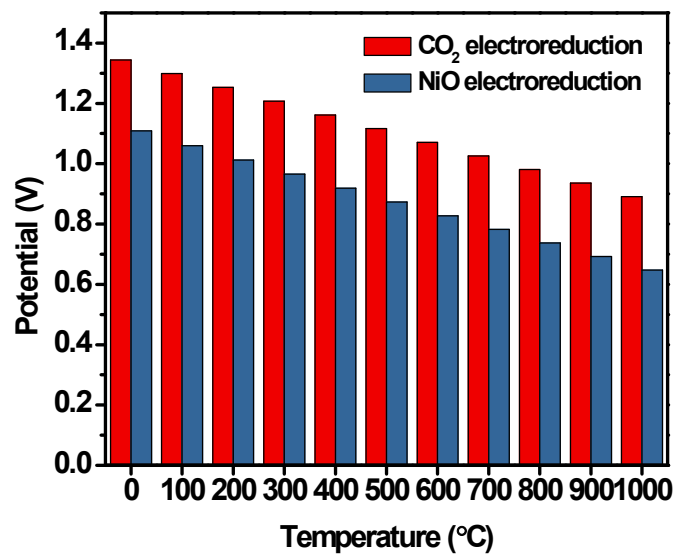

Figure R5. Bar chart for thermodynamic equilibrium voltage of CO<sub>2</sub> and NiO electrolysis at different temperatures.

## References

- 1 L. Kleiminger, T. Li, K. Li and G. H. Kelsall, *RSC Adv.*, 2014, **4**, 50003-50016.
- 2 P. Kim-Lohsoontorn and J. Bae, *J. Power Sources*, 2011, **196**, 7161-7168.
- 3 P. Kim-Lohsoontorn, N. Laosiripojana and J. Bae, *Curr. Appl. Phys.*, 2011, **11**, S223-S228.
- 4 W. Li, H. Wang, Y. Shi and N. Cai, *J. Hydrogen Energy*, 2013, **38**, 11104-11109.
- 5 M. Lo Faro, S. Trocino, S. C. Zignani, V. Antonucci and A. S. Aricò, *J. Hydrogen Energy*, 2017, **42**, 27859-27865.
- 6 T. Liu, X. Chen, J. Wu, Z. Sheng, G. Liu and Y. Wang, *J. Electrochem. Soc.*, 2017, **164**, F1130-F1135.
- 7 Y. Tao, S. D. Ebbesen and M. B. Mogensen, *J. Electrochem. Soc.*, 2014, **161**, F337-F343.
- 8 S. D. Ebbesen, C. Graves, A. Hauch, S. r. H. Jensen and M. Mogensen, *J. Electrochem. Soc.*, 2010, **157**, B1419.
- 9 M. Chen, Y. L. Liu, J. J. Bentzen, W. Zhang, X. Sun, A. Hauch, Y. Tao, J. R. Bowen and P. V. Hendriksen, *J. Electrochem. Soc.*, 2013, **160**, F883-F891.
- 10 Y. Tao, S. D. Ebbesen and M. B. Mogensen, *J. Power Sources*, 2016, **328**, 452-462.
- 11 C. Graves, S. D. Ebbesen and M. Mogensen, *Solid State Ionics*, 2011, **192**, 398-403.
- 12 X. Sun, M. Chen, Y. L. Liu, P. Hjalmarsson, S. D. Ebbesen, S. H. Jensen, M. B. Mogensen and P. V. Hendriksen, *J. Electrochem. Soc.*, 2013, **160**, F1074-F1080.
- 13 S. D. Ebbesen and M. Mogensen, *J. Power Sources*, 2009, **193**, 349-358.
- 14 Z. Zhan, W. Kobsiriphat, J. R. Wilson, M. Pillai, I. Kim and S. A. Barnett, *Energy Fuels*, 2009, **23**, 3089-3096.
- 15 Z. Zhan and L. Zhao, *J. Power Sources*, 2010, **195**, 7250-7254.
- 16 N. Ai, N. Li, S. He, Y. Cheng, M. Saunders, K. Chen, T. Zhang and S. P. Jiang, *J. Mater. Chem. A*, 2017, **5**.
- 17 V. Singh, H. Muroyama, T. Matsui, S. Hashigami, T. Inagaki and K. Eguchi, *J. Power Sources*, 2015, **293**, 642-648.
- 18 J. Yan, H. Chen, E. Dogdibegovic, J. W. Stevenson, M. Cheng and X.-D. Zhou, *J. Power Sources* 2014, **252**, 79-84.
- 19 V. Singh, H. Muroyama, T. Matsui and K. Eguchi, *Electrochemistry*, 2014, **82**, 839-844.
- 20 V. Singh, H. Muroyama and T. Matsui, In *ECS and Smeq Joint International Meeting*, 2014.
